# Supplementary material
Source: Springer Nature journal article supplement (https://www.springermedizin.de/resource/supplementary/12874_2002_34_MOESM1_ESM.pdf/9433682)
Supplement: MOESM1 [file 9433682]

|                                                         |                                             |                                               |                                                           |
|---------------------------------------------------------|---------------------------------------------|-----------------------------------------------|-----------------------------------------------------------|
| <i>probability<br/>if first<br/>screen<br/>at age a</i> | <i>time 0<br/>screen at<br/>age a<br/>/</i> | <i>time 1<br/>screen at<br/>age a+1<br/>/</i> | <i>probability<br/>if first<br/>screen at<br/>age a+1</i> |
|---------------------------------------------------------|---------------------------------------------|-----------------------------------------------|-----------------------------------------------------------|

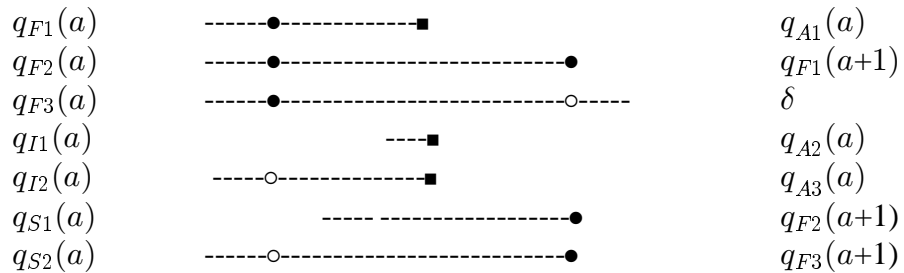

-----preclinical cancer

● screen-detected    ○ missed on screening    ■=clinical detection

---
